# Supplementary material
Source: publisher figshare collection journal article supplement (https://sage.figshare.com/ndownloader/files/15631445)
Supplement: Supplementary file 1 [file 15631445]

## Supporting information:

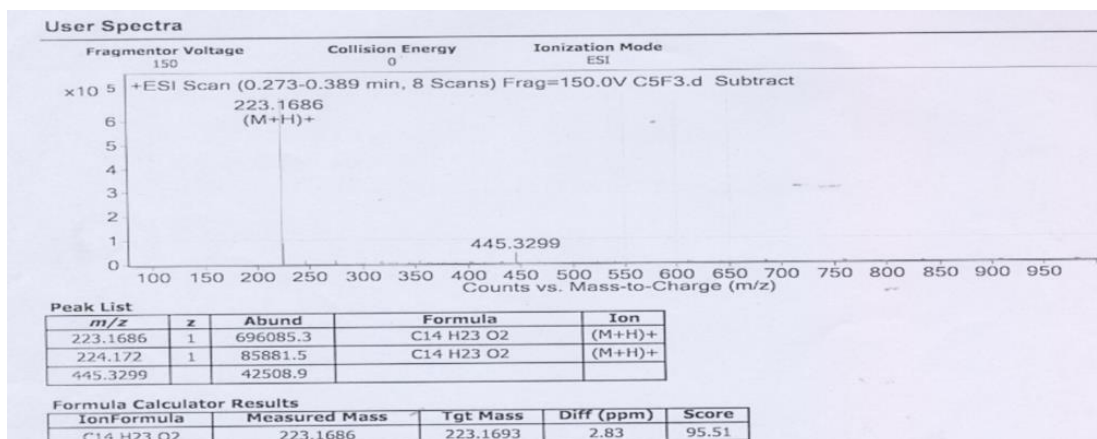

Figure S1. HR-ESI-MS spectrum of **1**

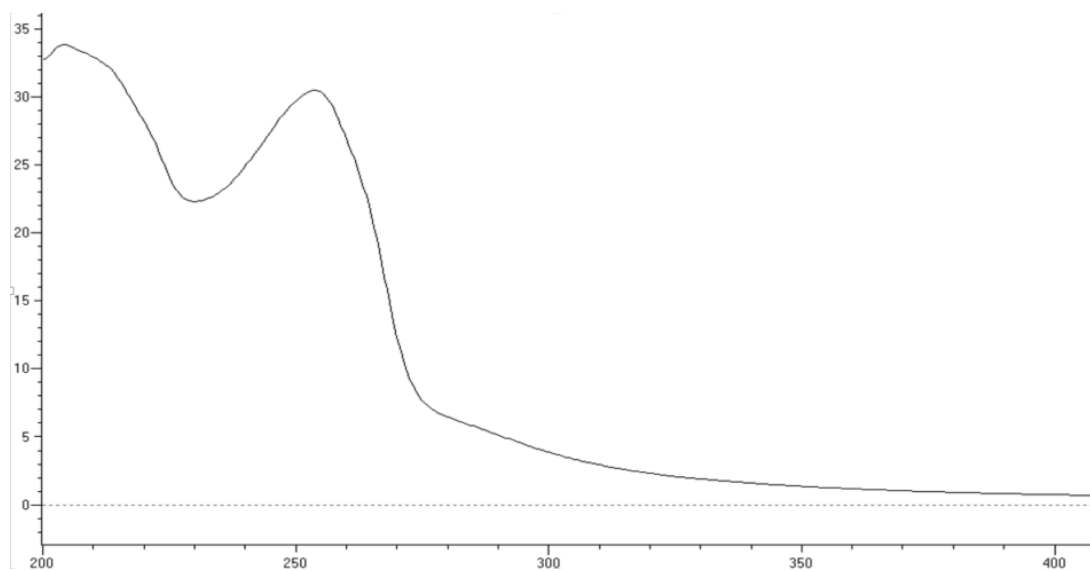

Figure S2. UV spectrum of **1**

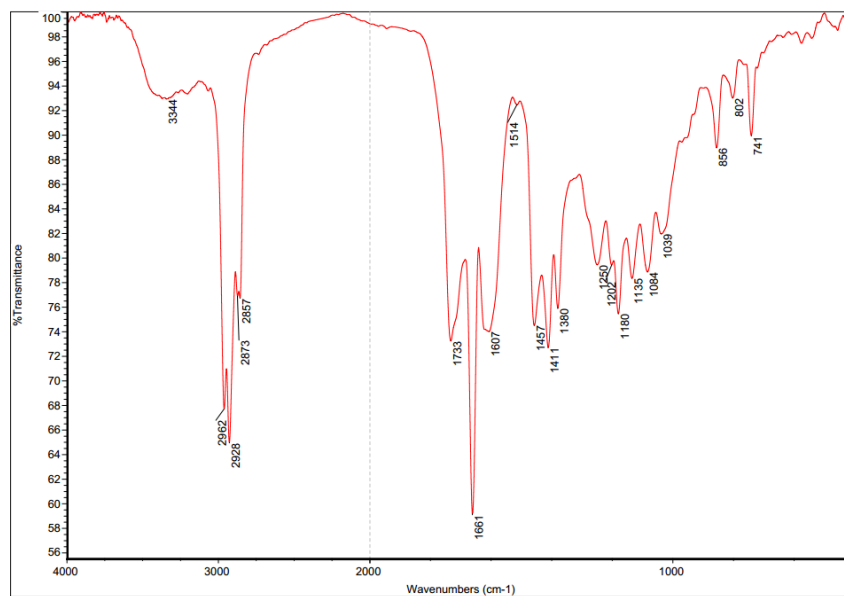

Figure S3. IR spectrum of **1**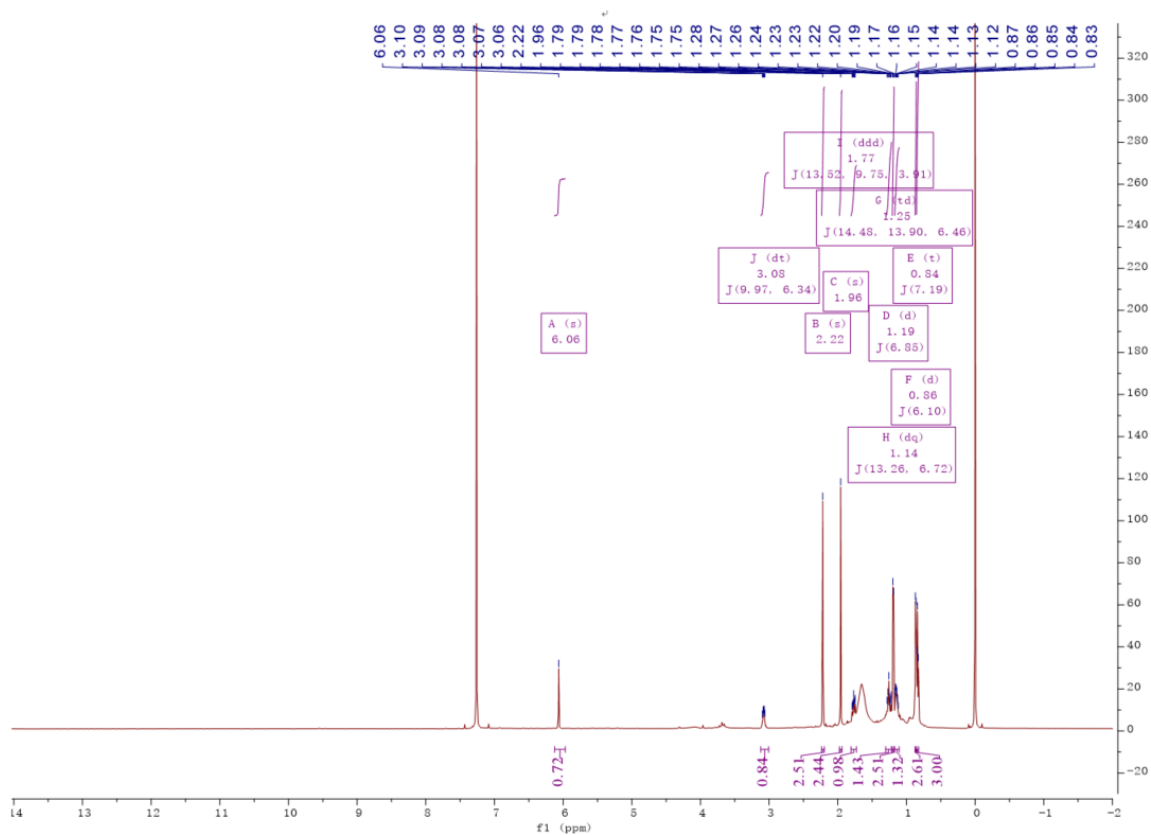Figure S4. <sup>1</sup>H NMR spectrum of compound **1** in CDCl<sub>3</sub>.

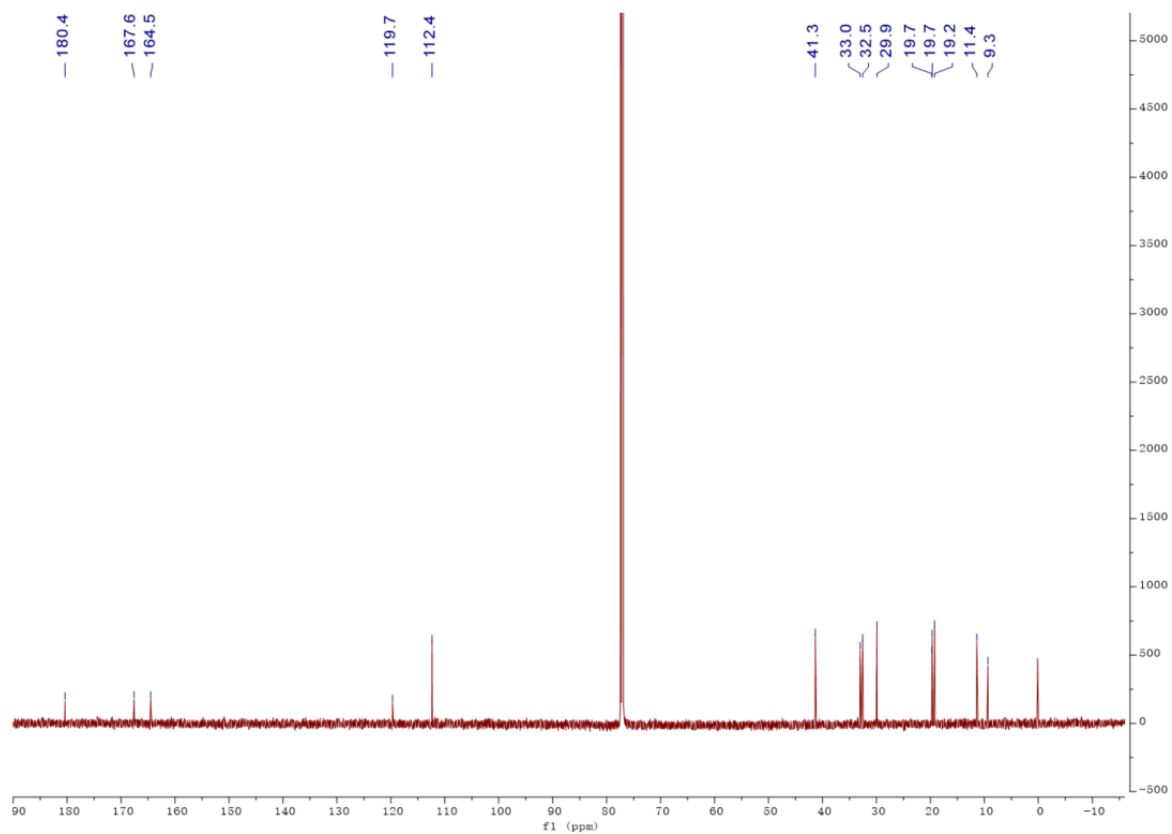Figure S5. <sup>13</sup>C NMR spectrum of compound **1** in CDCl<sub>3</sub>.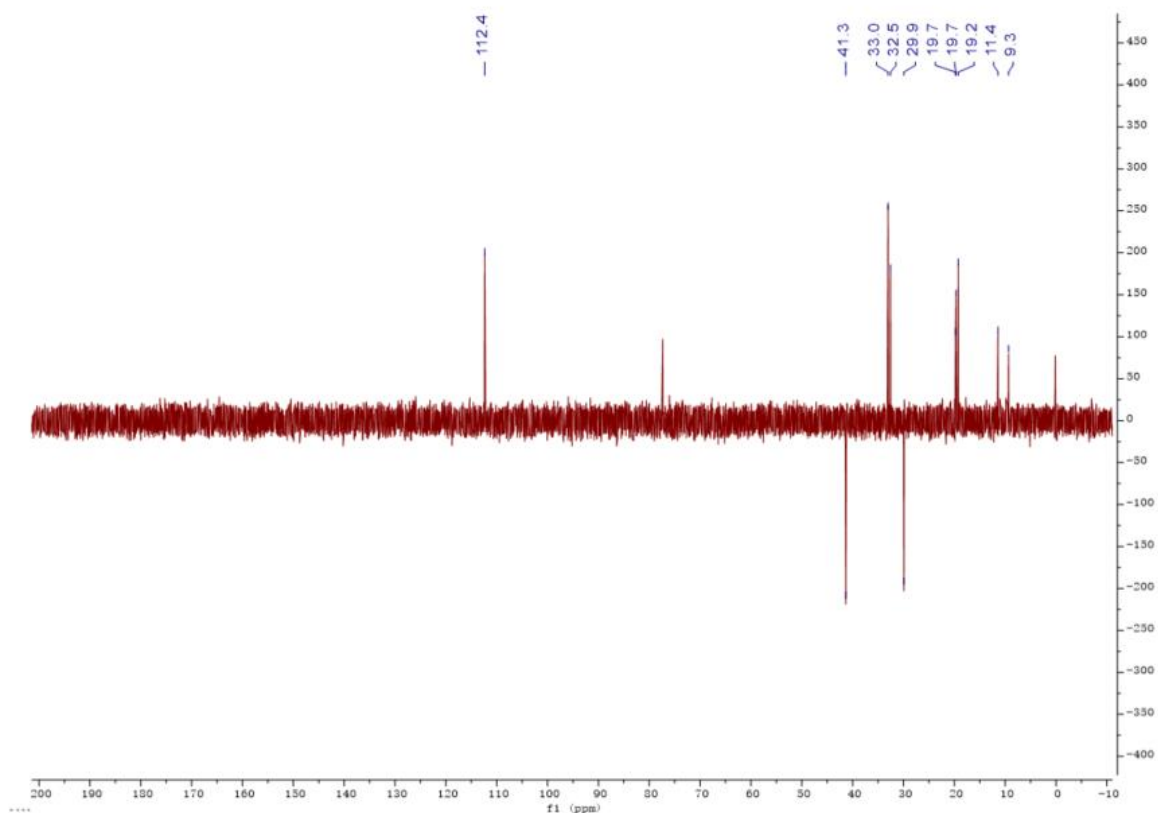Figure S6. DEPT135 spectrum of compound **1** in CDCl<sub>3</sub>.

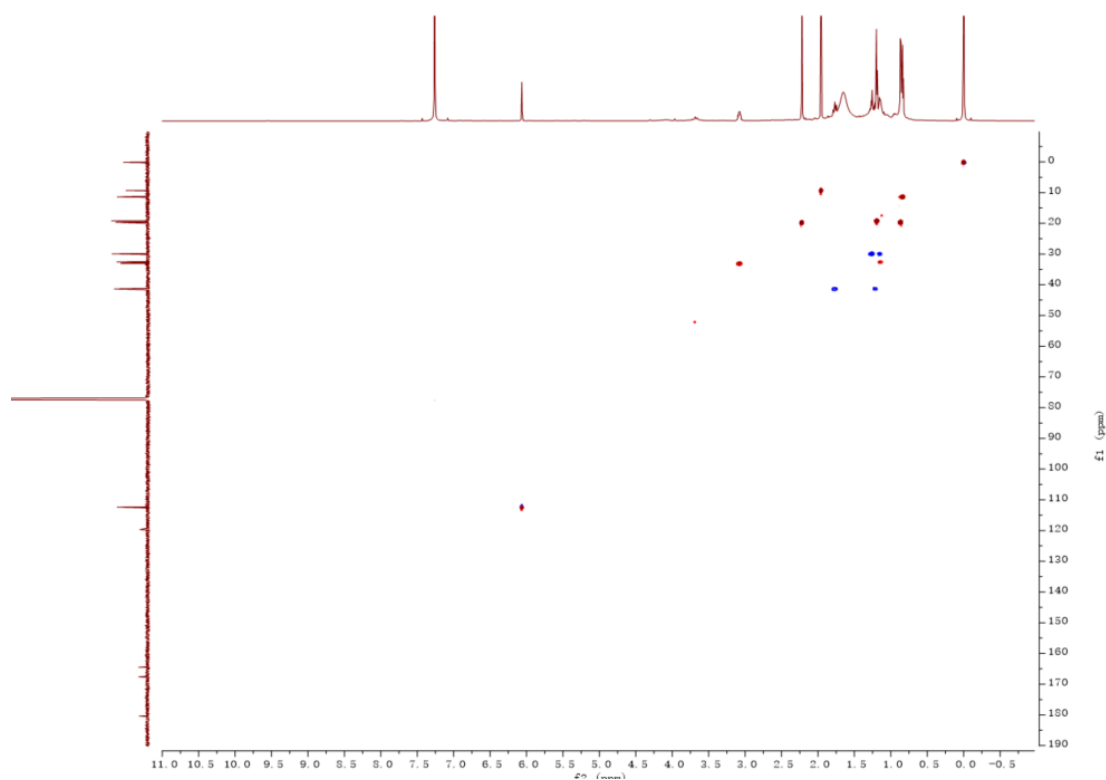**Figure S7.** HSQC spectrum of compound **1** in CDCl<sub>3</sub>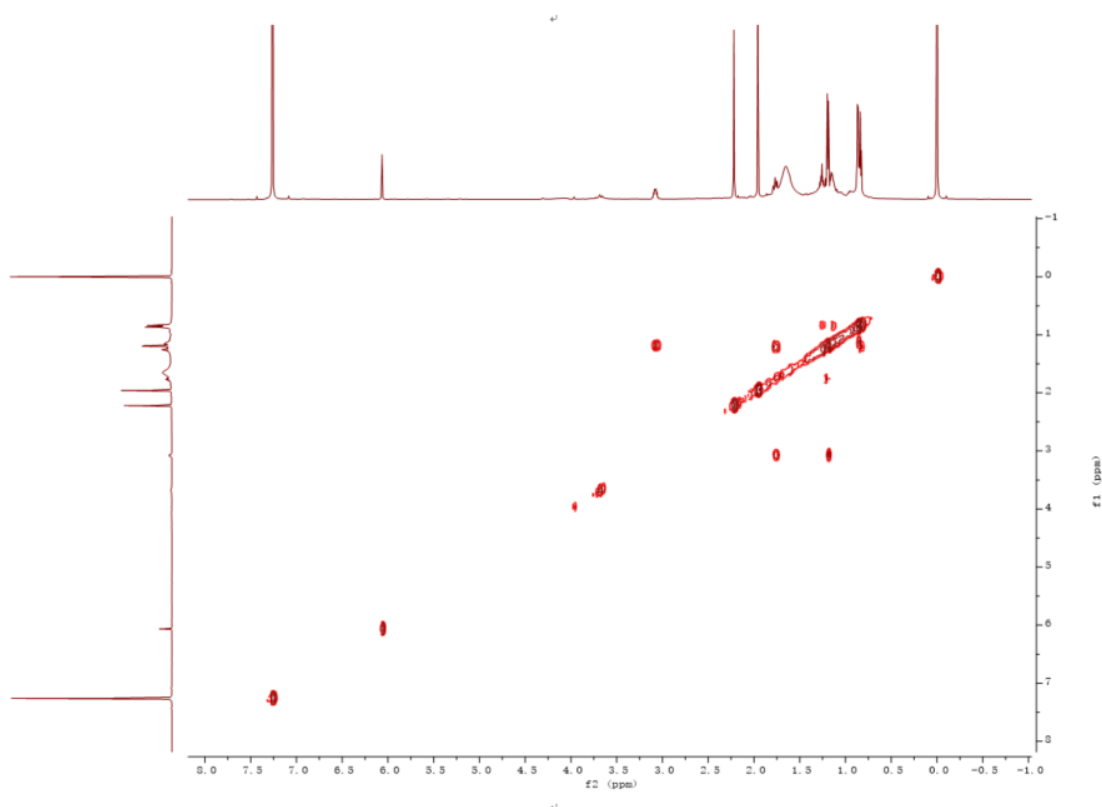**Figure S8.** <sup>1</sup>H-<sup>1</sup>H COSY spectrum of compound **1** in CDCl<sub>3</sub>.

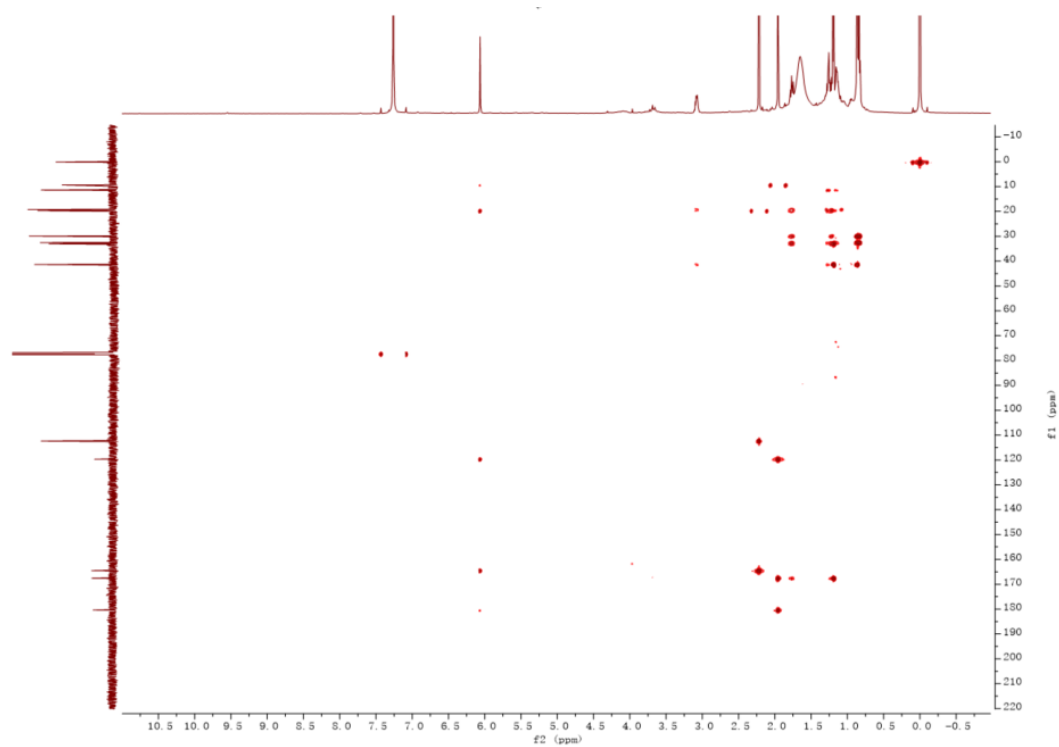

**Figure S9.** HMBC spectrum of compound **1** in CDCl<sub>3</sub>
